# Supplementary material for: Early Individual and Family Predictors of Weight Trajectories From Early Childhood to Adolescence: Results From the Millennium Cohort Study
Source: Front Pediatr. 2020 Aug 11;8:417. doi: 10.3389/fped.2020.00417 (PMC7431491; doi:10.3389/fped.2020.00417)
Supplement: Supplementary file 1 [file Data_Sheet_1.pdf]

# Early individual and family predictors of weight trajectories from early childhood to adolescence: results from the Millennium Cohort Study

Constança Soares dos Santos<sup>1,2,3\*</sup>, João Picoito<sup>2,3,4</sup>, Carla Nunes<sup>2,3</sup>, Isabel Loureiro<sup>2,3</sup>

<sup>1</sup>Department of Pediatrics, Centro Hospitalar Universitário Cova da Beira, Covilhã, Portugal

<sup>2</sup>Escola Nacional de Saúde Pública, Universidade NOVA de Lisboa, Lisboa, Portugal

<sup>3</sup>Centro de Investigação em Saúde Pública, Escola Nacional de Saúde Pública, Universidade NOVA de Lisboa, Lisboa, Portugal

<sup>4</sup>Department of Child and Adolescent Psychiatry, Centro Hospitalar e Universitário de Coimbra, Coimbra, Portugal, Portugal

Front. Pediatr. 8:417. doi: 10.3389/fped.2020.00417

## SUPPLEMENTARY MATERIAL

**Supplementary Table 1 – Child and Family covariates**

|                                                        | Response options                                                                   | Recoded                                                                                         |
|--------------------------------------------------------|------------------------------------------------------------------------------------|-------------------------------------------------------------------------------------------------|
| <i>Sociodemographic, Economic and Cultural Context</i> |                                                                                    |                                                                                                 |
| <b>Ethnicity</b>                                       | White / Mixed / Indian / Pakistani and Bangladeshi / Black or Black British/ Other | White/ Other<br>Ref: (1)                                                                        |
| <b>Family structure (Sweep 1)</b>                      |                                                                                    | Two carers or parents<br>One carer or parent                                                    |
| <b>OECD Median Poverty Indicator (Sweep 1)</b>         |                                                                                    | Above 60%<br>Below 60%                                                                          |
| <b>Mother age at cohort member birth</b>               | Continuous (years)                                                                 | <20 Y<br>20-40 Y<br>>40Y                                                                        |
| <b>Mother nutritional status (Sweep 1)</b>             | BMI (continuous)                                                                   | Underweight<br>Normal weight<br>Overweight/obesity<br>Ref: (2)                                  |
| <b>Mother education (Sweep 1)</b>                      | NVQ 1 / NVQ 2 / NVQ 3 / NVQ 4 / NVQ 5 / NVQ 6 / None / Overseas qualification      | NVQ >=4<br>NVQ<4, none or overseas<br>Ref: (3)                                                  |
| <i>Perinatal and Early Infancy</i>                     |                                                                                    |                                                                                                 |
| <b>Gestational age</b>                                 | Continuous (days)                                                                  | Extreme to moderate PT (<= 33w+6d)<br>Late PT (34w to 36w+6)<br>Term (>=37w)<br>Ref: (4)        |
| <b>Birthweight</b>                                     | Continuous (kg)                                                                    | Normal birthweight (2,5-4kg)<br>Low birthweight (<2,5kg)<br>High birthweight (>4kg)<br>Ref: (5) |
| <b>Birthweight for gestational age</b>                 | Continuous (centiles)                                                              | Appropriate for GA (P10-90)<br>Small for GA (<P10)<br>Big for GA (>P90)<br>Ref: (6)             |

|                                                                                                                                                                                                                                                                                                                                               |                                                                                                         |                                                                                                    |
|-----------------------------------------------------------------------------------------------------------------------------------------------------------------------------------------------------------------------------------------------------------------------------------------------------------------------------------------------|---------------------------------------------------------------------------------------------------------|----------------------------------------------------------------------------------------------------|
| <b>Breastfeeding duration</b>                                                                                                                                                                                                                                                                                                                 | Continuous (days)                                                                                       | Never<br>≤ 2 months<br>2 to 4 months<br>4 to 6 months<br>6 to 12 months<br>≥ 12 months<br>Ref: (7) |
| <b>Age at complementary feeding</b>                                                                                                                                                                                                                                                                                                           | Continuous (days)                                                                                       | Between 4 and 6 months<br>Early introduction<br>Late introduction<br>Ref: (8)                      |
| <b><i>Child temperament and self-regulation</i></b>                                                                                                                                                                                                                                                                                           |                                                                                                         |                                                                                                    |
| <b>Child temperament - Carey Infant Temperament Scale (Sweep 1)</b>                                                                                                                                                                                                                                                                           |                                                                                                         |                                                                                                    |
| He gets sleepy at about the same time each evening<br>His naps are about the same length from day to day<br>He wants and takes solid food at about the same time<br>He wants and takes milk feeds at about the same time                                                                                                                      | Almost never / Rarely /<br>Usually does not /<br>Often / Almost always                                  | Sum score - Carey –<br>Regularity<br>Ref: (9)                                                      |
| He is fretful for few minutes in a new place or situation<br>He appears bothered when put down in a different<br>sleeping place<br>He objects to being bathed in a different place/ by a<br>different person after 2 or 3 tries.<br>He is still wary of strangers after 15 minutes.<br>He is shy on meeting another child for the first time. | Almost never / Rarely /<br>Usually does not /<br>Often / Almost always                                  | Sum score - Carey –<br>Adaptability and<br>Approach/ Withdrawal<br>Ref: (9)                        |
| He makes happy sounds when changing nappy or being<br>dressed.<br>He is pleasant when arriving in unfamiliar places.<br>He is pleasant during like hair brushing or face washing.<br>He is content during interruptions of feeding.<br>He remains pleasant or calm with minor injuries.                                                       | Almost never / Rarely /<br>Usually does not /<br>Often / Almost always                                  | Sum score - Carey – Mood<br>Ref: (9)                                                               |
| <b>Child self-regulation - Child Social Behaviour Scale (Sweep 1)</b>                                                                                                                                                                                                                                                                         |                                                                                                         |                                                                                                    |
| Likes to work things out for self<br>Does not need much help with tasks<br>Chooses activities on his own<br>Persists in the face of difficult tasks<br>Move to new activity after finishing task                                                                                                                                              | Not true / Somewhat<br>true / Certainly true                                                            | Average score - CSBQ –<br>Independence and Self-<br>regulation<br>Ref: (10)                        |
| Shows mood swings<br>Gets over excited<br>Easily frustrated<br>Gets over being upset quickly<br>Acts impulsively                                                                                                                                                                                                                              | Not true / Somewhat<br>true / Certainly true                                                            | Average score – CSBQ –<br>Emotional Dysregulation<br>Ref: (10)                                     |
| <b><i>General Parenting and Child-Parent Relationship</i></b>                                                                                                                                                                                                                                                                                 |                                                                                                         |                                                                                                    |
| <b>Parenting beliefs (Sweep 1)</b>                                                                                                                                                                                                                                                                                                            |                                                                                                         |                                                                                                    |
| Babies need to be stimulated to develop well.<br>Talking, even to a young baby, is important.<br>Cuddling a baby is very important.                                                                                                                                                                                                           | Strongly disagree /<br>Disagree/ Neither agree<br>nor disagree / Agree /<br>Strongly agree              | Sum score – Parenting<br>beliefs<br>Ref: (11)                                                      |
| <b>Routines (Sweep 2)</b>                                                                                                                                                                                                                                                                                                                     |                                                                                                         |                                                                                                    |
| Does CM go to bed at regular times<br>Does CM have meals at regular times                                                                                                                                                                                                                                                                     | Never or almost never/<br>Sometimes/ Usually /<br>Always                                                | Sum score – Routines                                                                               |
| <b>Parenting activities (Sweep 2)</b>                                                                                                                                                                                                                                                                                                         |                                                                                                         |                                                                                                    |
| How often do you read to child<br>How often do you try to teach the alphabet<br>How often do you try to teach counting<br>How often do you teach songs/rhymes<br>How often does child paint/draw at home                                                                                                                                      | Occasionally or less<br>than once a week / 1-2<br>days per week /<br>Several times a week /<br>Everyday | Sum score – Parenting<br>activities                                                                |
| <b>Discipline practices - Murray Straus's Conflict Tactics Scale (Sweep 2) (alpha= 0,70)</b>                                                                                                                                                                                                                                                  |                                                                                                         |                                                                                                    |
| <b>How often do you do the following when child is naughty</b>                                                                                                                                                                                                                                                                                |                                                                                                         |                                                                                                    |
| Smack<br>Shout<br>Tell off                                                                                                                                                                                                                                                                                                                    | Never / Rarely / Once a<br>month / Once a week<br>or more / daily                                       | Sum score – Harsh<br>parenting<br>Ref: (12)                                                        |

|                                                                |                         |                        |
|----------------------------------------------------------------|-------------------------|------------------------|
| Ignore                                                         | Never / Rarely / Once a | Sum score – Positive   |
| Send to bedroom/naughty chair                                  | month / Once a week     | parenting              |
| Take away treats                                               | or more / daily         | Ref: (12)              |
| <b>Child-parent relationship - Pianta Short Form (Sweep 2)</b> |                         |                        |
| We share an affectionate relationship                          | Definitely does not     | Average score – Pianta |
| Child will seek comfort from me if upset                       | apply / Not really /    | Closeness              |
| Child values his/her relationship with me                      | Neutral, not sure /     |                        |
| When I praise him/her, child beams with pride                  | Applies sometimes /     |                        |
| Child spontaneously shares information                         | Definitely applies      |                        |
| It is easy to tune in to child's feelings                      |                         |                        |
| Child openly shares feelings and experiences with me           |                         |                        |
| Child and I always seem to be struggling with each other       | Definitely does not     | Average score – Pianta |
| Child is uncomfortable with physical affection or touch        | apply / Not really /    | Conflict               |
| Child easily becomes angry with me                             | Neutral, not sure /     |                        |
| Child remains angry and resistant after being disciplined      | Applies sometimes /     |                        |
| Dealing with my child drains my energy                         | Definitely applies      |                        |
| When child wakes up in a bad mood, I know we're in for a       |                         |                        |
| long and difficult day                                         |                         |                        |
| Child feelings towards me can be unpredictable                 |                         |                        |
| Child is sneaky or manipulative with me                        |                         |                        |

**Supplementary Table 2 – Child and Family psychosocial covariates**

| <b>Child Temperament – Carey Infant Temperament Scale</b>           |                                    |                      |                                   |                 |                       |  |                  |
|---------------------------------------------------------------------|------------------------------------|----------------------|-----------------------------------|-----------------|-----------------------|--|------------------|
| <b>Carey – Regularity</b>                                           | <b>Almost never</b>                | <b>Rarely</b>        | <b>Usually not</b>                | <b>Often</b>    | <b>Almost always</b>  |  | <b>% missing</b> |
| Sleepy at about the same time                                       | 424 (2,7)                          | 674 (4,2)            | 594 (3,7)                         | 4285 (27)       | 9922 (62,4)           |  | 7,4              |
| Naps about the same length                                          | 624 (4)                            | 1558 (9,9)           | 761 (4,8)                         | 5707 (36,1)     | 7139 (45,2)           |  | 8                |
| Solid food at about the same time                                   | 344 (2,2)                          | 652 (3,8)            | 557 (9,8)                         | 4349 (27,4)     | 9976 (62,8)           |  | 7,5              |
| Milk feeds about the same time                                      | 1069 (6,8)                         | 1333 (8,5)           | 1142 (7,3)                        | 4178 (26,7)     | 7940 (50,7)           |  | 8,8              |
| <b>Carey – Adaptability</b>                                         |                                    |                      |                                   |                 |                       |  |                  |
| Fretful in a new place or situation                                 | 7335 (46,6)                        | 4641 (29,5)          | 2041 (13)                         | 1267 (8,1)      | 444 (2,8)             |  | 8,4              |
| Bothered if different sleeping place                                | 3941 (28,9)                        | 3776 (27,7)          | 2564 (18,8)                       | 2101 (15,4)     | 1262 (9,2)            |  | 20,5             |
| Objects to bathing in a different place/person                      | 6998 (59)                          | 2233 (18,8)          | 1569 (13,2)                       | 553 (4,7)       | 510 (4,3)             |  | 30,9             |
| Wary of strangers                                                   | 7740 (49,3)                        | 4569 (29,1)          | 1793 (11,4)                       | 1078 (6,9)      | 511 (3,3)             |  | 8,6              |
| Shy on meeting another child                                        | 7700 (49,3)                        | 3843 (24,6)          | 2239 (14,3)                       | 1247 (8)        | 586 (3,8)             |  | 9                |
| <b>Carey - Mood</b>                                                 |                                    |                      |                                   |                 |                       |  |                  |
| Happy sounds when changing nappy                                    | 916 (5,8)                          | 1163 (7,3)           | 1372 (8,6)                        | 4988 (31,4)     | 7446 (46,9)           |  | 7,5              |
| Pleasant in new places                                              | 309 (2)                            | 990 (6,2)            | 1505 (9,5)                        | 5982 (37,8)     | 7055 (44,5)           |  | 7,7              |
| Pleasant during procedures like hair brushing or face washing.      | 1031 (6,5)                         | 2114 (13,3)          | 2824 (17,8)                       | 5363 (33,8)     | 4527 (28,5)           |  | 7,6              |
| Content during feeding interruptions                                | 1013 (6,4)                         | 1911 (12,1)          | 2530 (16)                         | 5518 (34,9)     | 4856 (30,7)           |  | 7,8              |
| Calm with minor injuries                                            | 974 (6,5)                          | 1911 (12,7)          | 2912 (19,3)                       | 5792 (38,5)     | 3469 (23)             |  | 12,3             |
| <b>Child Self-regulation - Child Social Behaviour Questionnaire</b> |                                    |                      |                                   |                 |                       |  |                  |
| <b>Independence / self-regulation</b>                               | <b>Not true</b>                    | <b>Somewhat true</b> | <b>Certainly true</b>             |                 |                       |  |                  |
| Likes to work things out for self                                   | 576 (4)                            | 5529 (38)            | 8436 (58)                         |                 |                       |  | 15,3             |
| Doesn't need much help with tasks                                   | 1427 (9,9)                         | 8363 (57,9)          | 4655 (32,2)                       |                 |                       |  | 15,9             |
| Chooses activities on his own                                       | 266 (1,8)                          | 4275 (29,3)          | 10041 (68,9)                      |                 |                       |  | 15,1             |
| Persists in difficult tasks                                         | 1387 (9,9)                         | 7802 (55,8)          | 4792 (34,3)                       |                 |                       |  | 18,6             |
| Move to new activity after finishing task                           | 383 (2,7)                          | 4660 (32,4)          | 9335 (64,9)                       |                 |                       |  | 16,2             |
| <b>Emotional dysregulation</b>                                      |                                    |                      |                                   |                 |                       |  |                  |
| Shows mood swings                                                   | 4650 (32,3)                        | 6201 (43)            | 3554 (24,7)                       |                 |                       |  | 16,1             |
| Gets over excited                                                   | 2925 (20,2)                        | 6805 (47,1)          | 4729 (32,7)                       |                 |                       |  | 15,8             |
| Easily frustrated                                                   | 4137 (28,8)                        | 6615 (46,1)          | 3594 (25,1)                       |                 |                       |  | 16,4             |
| Gets over being upset quickly                                       | 1080 (7,4)                         | 4939 (33,9)          | 8544 (58,7)                       |                 |                       |  | 15,2             |
| Acts impulsively                                                    | 4218 (30,3)                        | 6573 (47,3)          | 3115 (22,4)                       |                 |                       |  | 19               |
| <b>Parenting beliefs</b>                                            |                                    |                      |                                   |                 |                       |  |                  |
|                                                                     | <b>Strongly disagree</b>           | <b>Disagree</b>      | <b>Neither agree nor disagree</b> | <b>Agree</b>    | <b>Strongly agree</b> |  |                  |
| Importance of being stimulated                                      | 47 (0,3)                           | 66 (0,4)             | 520 (3,3)                         | 5053 (31,9)     | 10145 (64,1)          |  | 7,8              |
| Importance of talking                                               | 38 (0,2)                           | 6 (0,03)             | 37 (0,2)                          | 2832 (17,8)     | 13041 (81,7)          |  | 7,1              |
| Importance of cuddling                                              | 33 (0,2)                           | 16 (0,1)             | 129 (0,8)                         | 2525 (15,8)     | 13254 (83,1)          |  | 7                |
| <b>Household routines</b>                                           |                                    |                      |                                   |                 |                       |  |                  |
|                                                                     | <b>Never / almost never</b>        | <b>Sometimes</b>     | <b>Usually</b>                    | <b>Always</b>   |                       |  |                  |
| Regular bedtime                                                     | 1184 (7,7)                         | 2138 (14)            | 5730 (37,5)                       | 6243 (40,8)     |                       |  | 10,9             |
| Regular mealtime                                                    | 325 (2,1)                          | 1175 (7,7)           | 6559 (42,9)                       | 7236 (47,3)     |                       |  | 10,9             |
| <b>Parenting Activities</b>                                         |                                    |                      |                                   |                 |                       |  |                  |
|                                                                     | <b>Occasionally/ &lt; 1x/ week</b> | <b>1-2 days/week</b> | <b>Several times / week</b>       | <b>Everyday</b> |                       |  |                  |
| Reading                                                             | 1238 (8,1)                         | 2400 (15,7)          | 2893 (18,9)                       | 8764 (57,3)     |                       |  | 10,9             |

|                                                               |                                 |                   |                          |                          |                           |      |
|---------------------------------------------------------------|---------------------------------|-------------------|--------------------------|--------------------------|---------------------------|------|
| Help child learning alphabet                                  | 1894 (15,3)                     | 3303 (26,7)       | 4159 (33,6)              | 3009 (24,3)              |                           | 28   |
| Help child learning counting                                  | 782 (5,3)                       | 2070 (14,1)       | 4443 (30,2)              | 7398 (40,4)              |                           | 14,4 |
| Help child learning songs/rhymes                              | 594 (4,1)                       | 1590 (10,9)       | 4251 (29,2)              | 8105 (55,7)              |                           | 15,3 |
| Drawing                                                       | 592 (4)                         | 2173 (14,5)       | 5481 (36,6)              | 6736 (45)                |                           | 12,7 |
| <b>Discipline practices – Straus's Conflict Tactics Scale</b> |                                 |                   |                          |                          |                           |      |
| <b>Harsh parenting</b>                                        | <b>Never</b>                    | <b>Rarely</b>     | <b>1x/ month</b>         | <b>&gt;= 1x/ week</b>    | <b>Daily</b>              |      |
| Smack                                                         | 4467 (33,6)                     | 6933 (52,2)       | 642 (4,8)                | 1116 (8,4)               | 128 (1)                   | 22,6 |
| Shout                                                         | 445 (3,4)                       | 4341 (32,8)       | 987 (7,5)                | 5050 (38,2)              | 2404 (18,2)               | 22,9 |
| Tell off                                                      | 106 (0,8)                       | 1675 (12,6)       | 593 (4,5)                | 5828 (43,9)              | 5081 (38,3)               | 22,6 |
| <b>Positive parenting</b>                                     |                                 |                   |                          |                          |                           |      |
| Ignore                                                        | 2932 (22,7)                     | 4622 (35,7)       | 704 (5,4)                | 3144 (24,3)              | 1541 (11,9)               | 24,6 |
| Send to bedroom/naughty chair                                 | 3353 (25,2)                     | 3532 (26,5)       | 1593 (12)                | 3885 (29)                | 964 (7,2)                 | 22,4 |
| Take away treats                                              | 1923 (14,6)                     | 4671 (35,6)       | 1691 (12,9)              | 4034 (30,7)              | 814 (6,2)                 | 23,5 |
| <b>Parent Child Relationship – Pianta Short Form</b>          |                                 |                   |                          |                          |                           |      |
| <b>Pianta - Closeness</b>                                     | <b>Definitely doesn't apply</b> | <b>Not really</b> | <b>Neutral, not sure</b> | <b>Applies sometimes</b> | <b>Definitely applies</b> |      |
| Affectionate relationship                                     | 126 (0,9)                       | 31 (0,2)          | 71 (0,5)                 | 413 (2,4)                | 12935 (95,3)              | 20,9 |
| Seeks comfort                                                 | 119 (0,9)                       | 74 (0,5)          | 62 (0,5)                 | 938 (6,9)                | 12422 (91,2)              | 20,7 |
| Values relationship                                           | 158 (1,2)                       | 32 (0,2)          | 262 (2)                  | 556 (4,2)                | 12365 (92,5)              | 22,1 |
| Beams with pride when praised                                 | 99 (0,7)                        | 64 (0,5)          | 86 (0,6)                 | 1191 (8,8)               | 12149 (89,4)              | 20,8 |
| Spontaneously shares information                              | 110 (0,8)                       | 334 (2,5)         | 370 (6,1)                | 2838 (21,7)              | 9619 (72,5)               | 22,7 |
| Easy to tune with child's feelings                            | 115 (0,9)                       | 233 (1,7)         | 401 (3)                  | 2876 (21,3)              | 9867 (73,1)               | 21,4 |
| Openly shares feelings                                        | 207 (1,5)                       | 339 (2,5)         | 327 (2,4)                | 2467 (18,3)              | 10119 (75,2)              | 21,6 |
| <b>Pianta - Conflict</b>                                      |                                 |                   |                          |                          |                           |      |
| Always struggling                                             | 7564 (55,6)                     | 3866 (28,4)       | 246 (1,8)                | 1667 (12,3)              | 250 (1,8)                 | 20,8 |
| Uncomfortable with physical affection                         | 12105 (89,2)                    | 829 (6,1)         | 51 (0,4)                 | 188 (1,4)                | 405 (3)                   | 20,9 |
| Easily angry                                                  | 2461 (18,2)                     | 5060 (37,3)       | 629 (4,6)                | 4582 (33,8)              | 827 (6,1)                 | 21   |
| Resistant after being disciplined                             | 2562 (19)                       | 5347 (39,6)       | 425 (3,1)                | 4286 (31,7)              | 892 (6,6)                 | 21,3 |
| Drains my energy                                              | 2983 (22)                       | 4154 (30,6)       | 350 (2,6)                | 5243 (38,6)              | 845 (6,2)                 | 20,9 |
| Waking up in a bad mood means a long and difficult day        | 4204 (31)                       | 5184 (38,3)       | 371 (2,7)                | 2789 (20,6)              | 1000 (7,4)                | 21,1 |
| Unpredictable                                                 | 6043 (44,8)                     | 4632 (34,3)       | 499 (3,7)                | 1879 (13,9)              | 447 (3,3)                 | 21,4 |
| Sneaky or manipulative                                        | 7420 (55)                       | 3946 (29,2)       | 369 (2,7)                | 11471 (10,9)             | 288 (2,1)                 | 21,4 |

Data are given in n (%)

**Supplementary Table 3 – Differences between analytic and non-analytic samples**

|                                         |                         | Sample<br>(n=17165) | Excluded<br>(n=2078) | Pearson Chi²<br>p-value |
|-----------------------------------------|-------------------------|---------------------|----------------------|-------------------------|
| Gender                                  | Male                    | 51,1                | 54,0                 | 0,014                   |
|                                         | Female                  | 48,9                | 46,0                 |                         |
| Ethnicity                               | white                   | 82,3                | 79,4                 | 0,001                   |
|                                         | other                   | 17,7                | 20,6                 |                         |
| Gestational age                         | Extreme to moderate PT  | 2,0                 | 2,7                  | 0,079                   |
|                                         | Late PT                 | 5,5                 | 5,0                  |                         |
|                                         | Term                    | 92,6                | 92,3                 |                         |
| Birthweight                             | Low                     | 7,1                 | 8,5                  | 0,072                   |
|                                         | Normal                  | 82,2                | 81,5                 |                         |
|                                         | High                    | 10,7                | 10,1                 |                         |
| Birthweight for gestational age         | Small                   | 7,8                 | 9                    | 0,08                    |
|                                         | Appropriate             | 74,5                | 74,4                 |                         |
|                                         | Large                   | 17,8                | 16,6                 |                         |
| Breastfeeding                           | Never                   | 33,4                | 44,0                 | 0,000                   |
|                                         | Ever breastfed          | 66,6                | 56,0                 |                         |
| Age at complementary feeding            | Before 4 months         | 31,2                | 31,6                 | 0,077                   |
|                                         | Between 4 and 6 months  | 65,8                | 64,6                 |                         |
|                                         | After 6 months          | 3                   | 3,8                  |                         |
| Family structure (Sweep 1)              | Two parents/ carers     | 83,5                | 77,1                 | 0,000                   |
|                                         | One parent / carer      | 16,5                | 22,9                 |                         |
| OECD Median Poverty Indicator (Sweep 1) | Above 60% median        | 64,1                | 53,0                 | 0,000                   |
|                                         | Below 60% median        | 35,9                | 47,0                 |                         |
| Mother age at cohort member's birth     | 12 to 19 years          | 8,6                 | 10,8                 | 0,004                   |
|                                         | 20 to 39 years          | 89,2                | 87,1                 |                         |
|                                         | 40 plus                 | 2,2                 | 2,1                  |                         |
| Mother nutritional status at Sweep 1    | Underweight             | 12,8                | 14,3                 | 0,069                   |
|                                         | Normal weight           | 48,1                | 49,5                 |                         |
|                                         | Overweight              | 26                  | 24,3                 |                         |
|                                         | Obesity                 | 13,1                | 11,9                 |                         |
| Mother education (Sweep 1)              | NVQ<=3 / none/ overseas | 69,9                | 79,0                 | 0,000                   |
|                                         | NVQ=>4                  | 30,1                | 21,0                 |                         |
| Data are given in %                     |                         |                     |                      |                         |

## Supplementary Figure 1 - single-group models

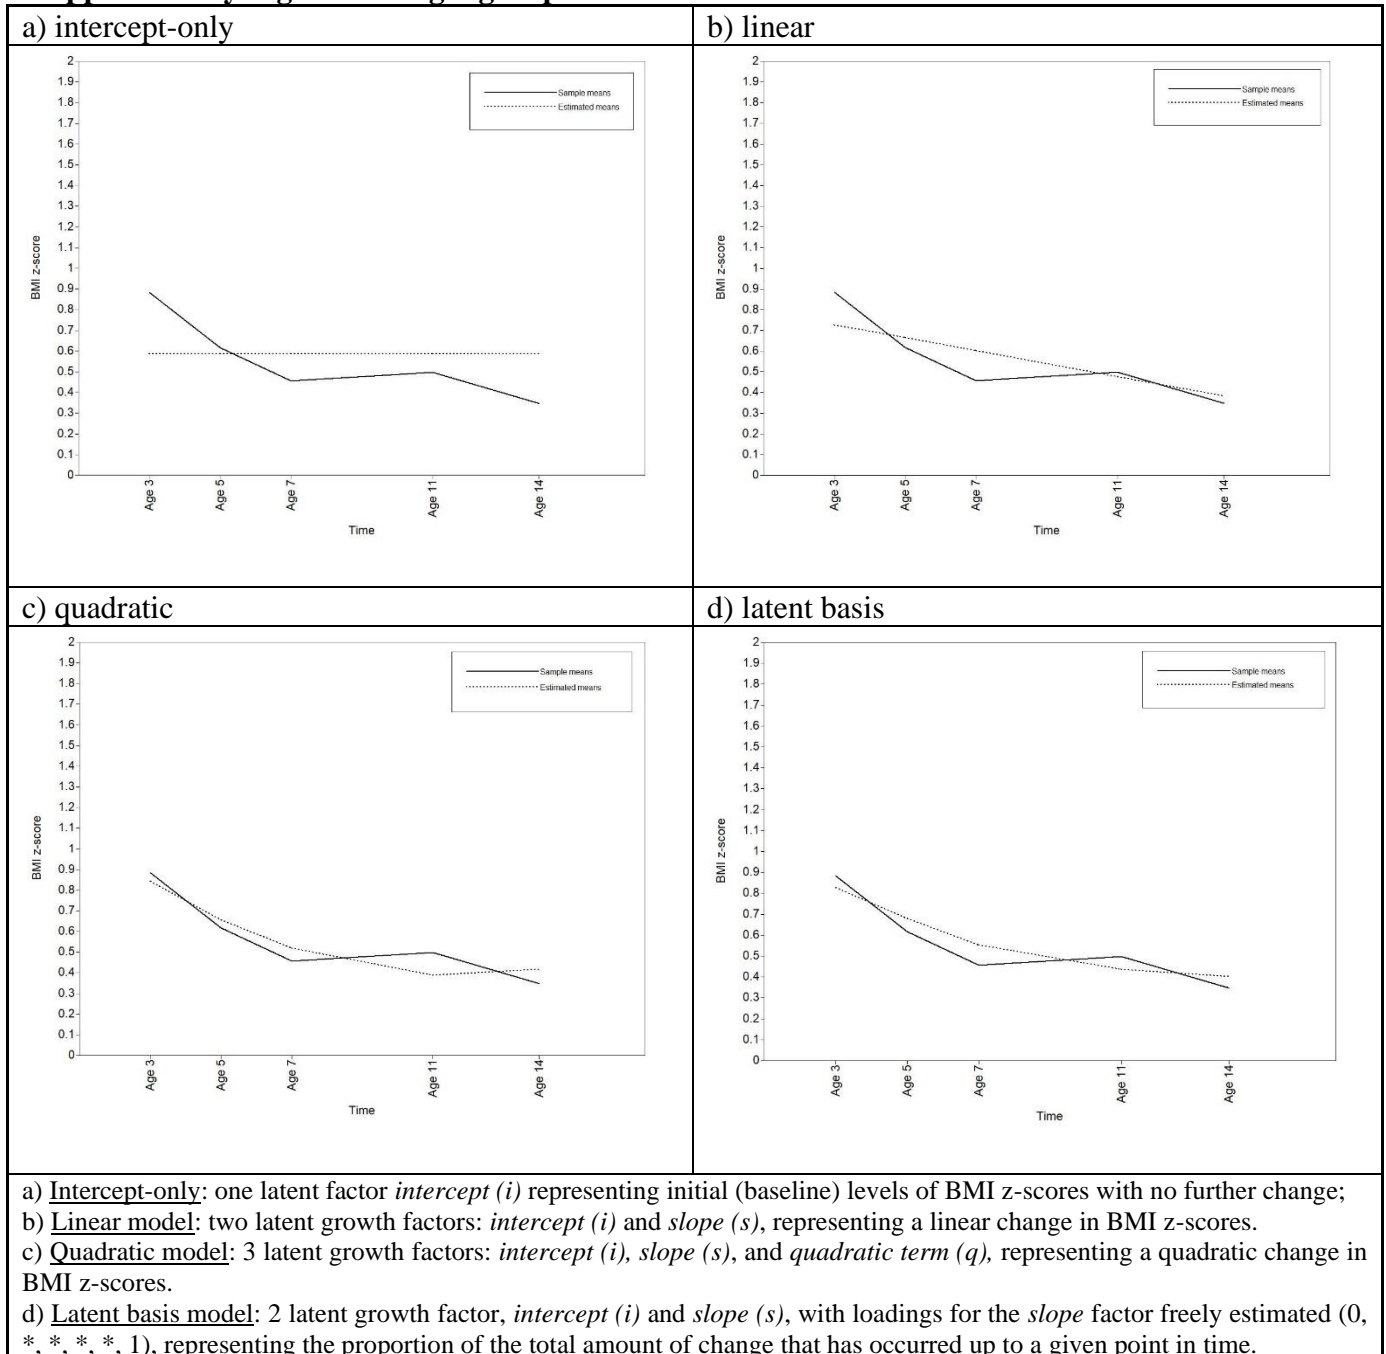

For the intercept-only model, we defined one latent factor *intercept* ( $i$ ) representing initial (baseline) levels of BMI z-scores. This model showed the poorest fit of all tested models (AIC 167810, aBIC 167842). For the linear model, we defined two latent growth factors: the *intercept* ( $i$ ) and the *slope* ( $s$ ), representing a linear change in BMI z-scores. This model showed a better fitting than the intercept-only model (AIC 160354, aBIC 160400), indicating that the assumption of linear change in BMI z-scores over time is at least preferred over the assumption of no change. For the quadratic model, we added a latent growth factor ( $q$ ) to the linear model. When estimating the quadratic model, we received a message about a negative residual variance for the Age 14

BMI z-score that was non-significant ( $-0,0003$ ,  $p$ -value  $>0,05$ ). As residuals cannot be negative, we addressed this problem by forcing this residual variance to be 0. This solution fixed the problem and no additional warnings were generated. This model showed a better fitting than the linear model (AIC 158479, aBIC 158525). For the cubic model, we added a latent growth factor ( $k$ ) to the quadratic model. When estimating the cubic model, ( $k$ ) and ( $q$ ) showed a correlation of  $-1,005$  ( $p$ -value  $< 0,001$ ). As correlation cannot be equal or superior to 1, we discarded this model. Finally, we estimated a latent basis model. For this model, loadings for the *slope* factor were freely estimated (0, \*, \*, \*, \*, 1), representing the proportion of the total amount of change that has occurred up to a given point in time. This model showed a better fitting than the linear model (AIC 159506, aBIC 159566), but lower than the quadratic model.

**Supplementary Table 4 - Four-Class Homoscedastic GMM - Latent Growth Factors means and variances**

|          |          | Weight loss |         | Early Weight Gain |         | Early Obesity |         | Late Weight Gain |         |
|----------|----------|-------------|---------|-------------------|---------|---------------|---------|------------------|---------|
|          |          |             | P value |                   | P value |               | P value |                  | P value |
| <b>I</b> | mean     | 0.723       | <0,001  | 0.931             | <0,001  | 3.102         | <0,001  | -0.716           | <0,001  |
|          | variance | 0.570       | <0,001  | 0.570             | <0,001  | 0.570         | <0,001  | 0.570            | <0,001  |
| <b>S</b> | mean     | -0.781      | <0,001  | 0.428             | <0,001  | -0.935        | <0,001  | 1.889            | <0,001  |
|          | variance | 0.500       | <0,001  | 0.500             | <0,001  | 0.500         | <0,001  | 0.500            | <0,001  |

(I) = Intercept (represents starting point); (S) = Slope (represents growth)

| <b>Supplementary Table 5.A – BMI trajectories and covariates: Unadjusted OR (n=17165)</b> |                                                     |              |               |                      |              |               |                         |              |              |
|-------------------------------------------------------------------------------------------|-----------------------------------------------------|--------------|---------------|----------------------|--------------|---------------|-------------------------|--------------|--------------|
| Variable (reference)                                                                      | BMI Trajectory (reference class: Weight loss – 69%) |              |               |                      |              |               |                         |              |              |
|                                                                                           | Late Weight Gain (3,3%)                             |              |               | Early Obesity (3,7%) |              |               | Early Weight Gain (24%) |              |              |
|                                                                                           | OR                                                  | Lower 95%CI  | Upper 95%CI   | OR                   | Lower 95%CI  | Upper 95%CI   | OR                      | Lower 95%CI  | Upper 95%CI  |
| Male gender (female)                                                                      | <b>0,630</b>                                        | <b>0,434</b> | <b>0,916</b>  | <b>1,688</b>         | <b>1,248</b> | <b>2,282</b>  | 0,834                   | 0,690        | 1,008        |
| Ethnicity (white)                                                                         | <b>0,139</b>                                        | <b>0,095</b> | <b>0,203</b>  | <b>0,315</b>         | <b>0,224</b> | <b>0,444</b>  | 0,741                   | 0,548        | 1,003        |
| Mixed                                                                                     | <b>3,539</b>                                        | <b>1,876</b> | <b>6,677</b>  | <b>2,345</b>         | <b>1,379</b> | <b>3,989</b>  | 1,416                   | 0,891        | 2,250        |
| Indian                                                                                    | <b>11,566</b>                                       | <b>7,053</b> | <b>18,967</b> | 1,147                | 0,474        | 2,777         | 0,853                   | 0,426        | 1,709        |
| Pakistani and Bangladeshi                                                                 | <b>11,236</b>                                       | <b>7,663</b> | <b>16,475</b> | <b>2,810</b>         | <b>1,966</b> | <b>4,018</b>  | 1,310                   | 0,917        | 1,872        |
| Black and Black British                                                                   | <b>3,802</b>                                        | <b>2,255</b> | <b>6,409</b>  | <b>7,475</b>         | <b>4,985</b> | <b>11,209</b> | <b>2,073</b>            | <b>1,325</b> | <b>3,242</b> |
| Other                                                                                     | <b>4,364</b>                                        | <b>2,282</b> | <b>8,344</b>  | <b>2,487</b>         | <b>1,250</b> | <b>4,951</b>  | 0,852                   | 0,381        | 1,901        |
| Single-parenthood (living with both parents)                                              | <b>1,895</b>                                        | <b>1,215</b> | <b>2,957</b>  | <b>1,772</b>         | <b>1,194</b> | <b>2,629</b>  | <b>1,421</b>            | <b>1,111</b> | <b>1,819</b> |
| OECD Poverty Indicator (above 60%)                                                        | <b>2,248</b>                                        | <b>1,501</b> | <b>3,365</b>  | <b>1,747</b>         | <b>1,302</b> | <b>2,344</b>  | <b>1,669</b>            | <b>1,371</b> | <b>2,032</b> |
| Mother age at cohort member birth (20-40Y)                                                |                                                     |              |               |                      |              |               |                         |              |              |
| <20Y                                                                                      | 0,822                                               | 0,380        | 1,778         | 0,941                | 0,524        | 1,688         | 0,905                   | 0,608        | 1,348        |
| >40Y                                                                                      | 1,495                                               | 0,512        | 4,368         | 1,613                | 0,695        | 3,743         | 1,301                   | 0,681        | 2,487        |
| Maternal Nutritional Status (normal weight)                                               |                                                     |              |               |                      |              |               |                         |              |              |
| Overweight/obesity                                                                        | <b>1,722</b>                                        | <b>1,064</b> | <b>2,789</b>  | <b>4,938</b>         | <b>3,448</b> | <b>7,071</b>  | <b>4,233</b>            | <b>3,321</b> | <b>5,395</b> |
| Underweight/obesity                                                                       | 1,166                                               | 0,652        | 2,082         | 0,679                | 0,295        | 1,564         | 0,155                   | 0,010        | 2,408        |
| High maternal education (low/none)                                                        | 0,632                                               | 0,389        | 1,024         | <b>0,531</b>         | <b>0,359</b> | <b>0,787</b>  | <b>0,578</b>            | <b>0,458</b> | <b>0,729</b> |
| Gestational age (term)                                                                    |                                                     |              |               |                      |              |               |                         |              |              |
| Extreme to moderate Prematurity                                                           | <b>3,137</b>                                        | <b>1,408</b> | <b>6,989</b>  | 0,478                | 0,082        | 2,766         | 1,090                   | 0,503        | 2,363        |
| Late prematurity                                                                          | 1,755                                               | 0,932        | 3,308         | 1,698                | 0,964        | 2,990         | <b>1,798</b>            | <b>1,166</b> | <b>2,774</b> |
| Birthweight (normal)                                                                      |                                                     |              |               |                      |              |               |                         |              |              |
| Low birthweight                                                                           | <b>2,594</b>                                        | <b>1,582</b> | <b>4,254</b>  | 0,748                | 0,370        | 1,516         | 1,006                   | 0,650        | 1,558        |
| High birthweight                                                                          | 0,258                                               | 0,037        | 1,781         | <b>1,851</b>         | <b>1,311</b> | <b>2,614</b>  | <b>1,621</b>            | <b>1,236</b> | <b>2,127</b> |
| Birthweight for gestational age (appropriate)                                             |                                                     |              |               |                      |              |               |                         |              |              |
| Small for GA                                                                              | <b>2,648</b>                                        | <b>1,670</b> | <b>4,198</b>  | 0,802                | 0,395        | 1,626         | 0,870                   | 0,568        | 1,332        |
| Large for GA                                                                              | 0,472                                               | 0,196        | 1,141         | <b>1,963</b>         | <b>1,448</b> | <b>2,661</b>  | <b>1,408</b>            | <b>1,123</b> | <b>1,767</b> |
| Breastfeeding duration (never)                                                            |                                                     |              |               |                      |              |               |                         |              |              |
| <= 2 months                                                                               | 0,741                                               | 0,445        | 1,236         | 0,922                | 0,637        | 1,336         | 1,034                   | 0,804        | 1,328        |
| 2-4 months                                                                                | 0,792                                               | 0,401        | 1,563         | 0,855                | 0,552        | 1,326         | <b>0,549</b>            | <b>0,353</b> | <b>0,855</b> |
| 4-6 months                                                                                | 0,588                                               | 0,248        | 1,393         | <b>0,452</b>         | <b>0,223</b> | <b>0,917</b>  | <b>0,571</b>            | <b>0,357</b> | <b>0,915</b> |
| 6-12 months                                                                               | 0,906                                               | 0,482        | 1,700         | <b>0,406</b>         | <b>0,213</b> | <b>0,773</b>  | <b>0,697</b>            | <b>0,492</b> | <b>0,989</b> |
| >=12 minths                                                                               | 1,250                                               | 0,715        | 2,185         | 0,581                | 0,290        | 1,164         | <b>0,486</b>            | <b>0,303</b> | <b>0,780</b> |
| Introduction to solid food (4-6 months)                                                   |                                                     |              |               |                      |              |               |                         |              |              |
| Early introduction                                                                        | 0,932                                               | 0,593        | 1,465         | <b>1,921</b>         | <b>1,398</b> | <b>2,640</b>  | <b>1,483</b>            | <b>1,198</b> | <b>1,836</b> |
| Late introduction                                                                         | 1,981                                               | 0,905        | 4,337         | 1,469                | 0,685        | 3,150         | 1,320                   | 0,730        | 2,385        |
| Carey – Mood                                                                              | 0,955                                               | 0,898        | 1,016         | 1,014                | 0,965        | 1,066         | <b>1,057</b>            | <b>1,021</b> | <b>1,093</b> |
| Carey – Regularity                                                                        | <b>1,065</b>                                        | <b>1,008</b> | <b>1,125</b>  | 1,031                | 0,986        | 1,078         | 1,003                   | 0,971        | 1,037        |
| Carey Adaptability                                                                        | <b>0,892</b>                                        | <b>0,834</b> | <b>0,953</b>  | <b>0,924</b>         | <b>0,887</b> | <b>0,963</b>  | <b>0,966</b>            | <b>0,936</b> | <b>0,997</b> |
| CSBQ - independence                                                                       | 0,686                                               | 0,365        | 1,289         | 0,658                | 0,423        | 1,026         | 1,144                   | 0,851        | 1,537        |
| CSBQ – emotional dysregulation                                                            | <b>1,586</b>                                        | <b>1,104</b> | <b>2,278</b>  | <b>1,678</b>         | <b>1,249</b> | <b>2,253</b>  | <b>1,277</b>            | <b>1,029</b> | <b>1,585</b> |

|                      |              |              |              |              |              |              |              |              |              |
|----------------------|--------------|--------------|--------------|--------------|--------------|--------------|--------------|--------------|--------------|
| Household routines   | <b>0,724</b> | <b>0,626</b> | <b>0,837</b> | <b>0,782</b> | <b>0,699</b> | <b>0,875</b> | <b>0,846</b> | <b>0,784</b> | <b>0,913</b> |
| Parenting beliefs    | <b>0,859</b> | <b>0,779</b> | <b>0,948</b> | 0,905        | 0,794        | 1,031        | 1,022        | 0,928        | 1,126        |
| Parenting activities | 1,032        | 0,991        | 1,075        | 0,997        | 0,966        | 1,029        | 1,005        | 0,980        | 1,031        |
| Harsh parenting      | 1,118        | 0,947        | 1,320        | 1,100        | 0,949        | 1,275        | 1,075        | 0,981        | 1,178        |
| Positive parenting   | <b>0,924</b> | <b>0,858</b> | <b>0,996</b> | 0,979        | 0,918        | 1,046        | 0,960        | 0,920        | 1,002        |
| Pianta – Closeness   | <b>0,916</b> | <b>0,870</b> | <b>0,964</b> | 0,966        | 0,918        | 1,018        | 0,979        | 0,937        | 1,024        |
| Pianta - Conflict    | <b>1,040</b> | <b>1,003</b> | <b>1,079</b> | <b>1,040</b> | <b>1,013</b> | <b>1,067</b> | 1,007        | 0,989        | 1,026        |

| <b>Supplementary Table 5.B – BMI trajectories and covariates: Adjusted OR (n=17165)</b> |                                                     |              |               |                      |              |               |                         |              |              |
|-----------------------------------------------------------------------------------------|-----------------------------------------------------|--------------|---------------|----------------------|--------------|---------------|-------------------------|--------------|--------------|
| Variable (reference)                                                                    | BMI Trajectory (reference class: Weight loss – 69%) |              |               |                      |              |               |                         |              |              |
|                                                                                         | Late Weight Gain (3,3%)                             |              |               | Early Obesity (3,7%) |              |               | Early Weight Gain (24%) |              |              |
|                                                                                         | OR                                                  | Lower 95%CI  | Upper 95%CI   | OR                   | Lower 95%CI  | Upper 95%CI   | OR                      | Lower 95%CI  | Upper 95%CI  |
| Male gender (female)                                                                    | 0,713                                               | 0,451        | 1,125         | <b>1,436</b>         | <b>1,030</b> | <b>2,001</b>  | 0,781                   | 0,606        | 1,006        |
| Ethnicity (white)                                                                       |                                                     |              |               |                      |              |               |                         |              |              |
| Mixed                                                                                   | <b>2,601</b>                                        | <b>1,052</b> | <b>6,431</b>  | <b>2,786</b>         | <b>1,435</b> | <b>5,411</b>  | 1,564                   | 0,833        | 2,935        |
| Indian                                                                                  | <b>10,344</b>                                       | <b>4,737</b> | <b>22,587</b> | 1,776                | 0,644        | 4,895         | 0,863                   | 0,249        | 2,999        |
| Pakistani and Bangladeshi                                                               | <b>8,455</b>                                        | <b>4,211</b> | <b>16,975</b> | <b>2,803</b>         | <b>1,580</b> | <b>4,972</b>  | 1,272                   | 0,755        | 2,144        |
| Black and Black British                                                                 | <b>2,877</b>                                        | <b>1,239</b> | <b>6,680</b>  | <b>8,301</b>         | <b>4,312</b> | <b>15,983</b> | <b>1,970</b>            | <b>0,885</b> | <b>4,385</b> |
| Other                                                                                   | <b>4,043</b>                                        | <b>1,555</b> | <b>10,508</b> | <b>3,125</b>         | <b>1,136</b> | <b>8,591</b>  | 0,866                   | 0,213        | 3,516        |
| Single-parenthood (living with both parents)                                            | 1,733                                               | 0,974        | 3,084         | 1,306                | 0,761        | 2,242         | 1,200                   | 0,824        | 1,748        |
| OECD Poverty Indicator (above 60%)                                                      | 0,961                                               | 0,546        | 1,691         | 1,060                | 0,721        | 1,558         | <b>1,454</b>            | <b>1,061</b> | <b>1,992</b> |
| Mother age at cohort member birth (20-40Y)                                              |                                                     |              |               |                      |              |               |                         |              |              |
| <20Y                                                                                    | 0,666                                               | 0,277        | 1,602         | 0,604                | 0,284        | 1,286         | 0,610                   | 0,345        | 1,078        |
| >40Y                                                                                    | 1,645                                               | 0,443        | 6,103         | 1,567                | 0,621        | 3,951         | 1,309                   | 0,469        | 3,656        |
| Maternal Nutritional Status (normal weight)                                             |                                                     |              |               |                      |              |               |                         |              |              |
| Overweight/obesity                                                                      | 1,459                                               | 0,857        | 2,484         | <b>4,353</b>         | <b>2,922</b> | <b>6,485</b>  | <b>3,978</b>            | <b>3,067</b> | <b>5,160</b> |
| Underweight/obesity                                                                     | 0,857                                               | 0,452        | 1,622         | 0,649                | 0,270        | 1,562         | <b>0,181</b>            | <b>0,034</b> | <b>0,968</b> |
| High maternal education (low/none)                                                      | 0,856                                               | 0,467        | 1,569         | 0,673                | 0,422        | 1,074         | 0,760                   | 0,559        | 1,033        |
| Gestational age (term)                                                                  |                                                     |              |               |                      |              |               |                         |              |              |
| Extreme to moderate Prematurity                                                         | <b>3,354</b>                                        | <b>1,269</b> | <b>8,866</b>  | 0,907                | 0,066        | 12,377        | 1,726                   | 0,627        | 4,754        |
| Late prematurity                                                                        | 1,895                                               | 0,949        | 3,785         | 2,203                | 0,977        | 4,964         | <b>2,365</b>            | <b>1,290</b> | <b>4,337</b> |
| Birthweight (normal)                                                                    |                                                     |              |               |                      |              |               |                         |              |              |
| Low birthweight                                                                         | <b>0,907</b>                                        | <b>0,375</b> | <b>2,193</b>  | 0,544                | 0,144        | 2,063         | 0,636                   | 0,300        | 1,349        |
| High birthweight                                                                        | 0,513                                               | 0,081        | 3,227         | <b>1,216</b>         | <b>0,680</b> | <b>2,172</b>  | <b>1,614</b>            | <b>1,020</b> | <b>2,553</b> |
| Birthweight for gestational age (appropriate)                                           |                                                     |              |               |                      |              |               |                         |              |              |
| Small for GA                                                                            | <b>1,937</b>                                        | <b>0,946</b> | <b>3,968</b>  | 0,700                | 0,318        | 1,539         | 0,892                   | 0,501        | 1,588        |
| Large for GA                                                                            | <b>0,681</b>                                        | <b>0,248</b> | <b>1,870</b>  | <b>1,682</b>         | <b>1,046</b> | <b>2,703</b>  | 0,940                   | 0,637        | 1,387        |
| Breastfeeding duration (never)                                                          |                                                     |              |               |                      |              |               |                         |              |              |
| <= 2 months                                                                             | 0,710                                               | 0,408        | 1,233         | 0,940                | 0,608        | 1,454         | 1,046                   | 0,765        | 1,431        |
| 2-4 months                                                                              | 0,828                                               | 0,378        | 1,813         | 0,885                | 0,538        | 1,456         | 0,649                   | 0,402        | 1,048        |
| 4-6 months                                                                              | 0,734                                               | 0,265        | 2,032         | 0,552                | 0,280        | 1,085         | 0,679                   | 0,378        | 1,220        |
| 6-12 months                                                                             | 1,210                                               | 0,572        | 2,561         | 0,524                | 0,275        | 1,001         | 0,891                   | 0,562        | 1,411        |
| >=12 minths                                                                             | 1,346                                               | 0,675        | 2,686         | 0,591                | 0,273        | 1,279         | 0,578                   | 0,319        | 1,047        |
| Introduction to solid food (4-6 months)                                                 |                                                     |              |               |                      |              |               |                         |              |              |
| Early introduction                                                                      | 1,318                                               | 0,782        | 2,222         | <b>1,827</b>         | <b>1,275</b> | <b>2,619</b>  | 1,307                   | 0,998        | 1,712        |
| Late introduction                                                                       | 1,194                                               | 0,528        | 2,700         | 0,848                | 0,304        | 2,361         | 1,076                   | 0,536        | 2,158        |
| Carey – Mood                                                                            | 0,991                                               | 0,928        | 1,059         | 1,058                | 0,998        | 1,121         | <b>1,047</b>            | <b>1,006</b> | <b>1,089</b> |
| Carey – Regularity                                                                      | 0,979                                               | 0,918        | 1,044         | 1,001                | 0,952        | 1,053         | 1,007                   | 0,969        | 1,046        |
| Carey Adaptability                                                                      | 0,983                                               | 0,897        | 1,077         | 0,978                | 0,929        | 1,031         | 0,998                   | 0,957        | 1,039        |
| CSBQ - independence                                                                     | 1,049                                               | 0,579        | 1,901         | 0,826                | 0,538        | 1,267         | 1,121                   | 0,798        | 1,574        |
| CSBQ – emotional dysregulation                                                          | 1,091                                               | 0,704        | 1,691         | 1,289                | 0,896        | 1,856         | 1,197                   | 0,898        | 1,596        |

|                      |              |              |              |              |              |              |              |              |              |
|----------------------|--------------|--------------|--------------|--------------|--------------|--------------|--------------|--------------|--------------|
| Household routines   | <b>0,804</b> | <b>0,686</b> | <b>0,943</b> | <b>0,871</b> | <b>0,763</b> | <b>0,994</b> | <b>0,899</b> | <b>0,821</b> | <b>0,985</b> |
| Parenting beliefs    | 0,964        | 0,825        | 1,126        | 1,015        | 0,864        | 1,192        | 1,086        | 0,977        | 1,207        |
| Parenting activities | 1,018        | 0,976        | 1,062        | 0,999        | 0,962        | 1,037        | 1,005        | 0,974        | 1,036        |
| Harsh parenting      | 0,957        | 0,856        | 1,069        | 1,026        | 0,943        | 1,116        | 1,059        | 0,991        | 1,132        |
| Positive parenting   | 0,959        | 0,880        | 1,044        | 0,969        | 0,899        | 1,045        | 0,945        | 0,893        | 1,000        |
| Pianta – Closeness   | 0,947        | 0,878        | 1,022        | 1,046        | 0,972        | 1,126        | 1,028        | 0,964        | 1,095        |
| Pianta - Conflict    | 1,032        | 0,986        | 1,081        | 1,031        | 0,999        | 1,064        | 1,003        | 0,976        | 1,031        |

## References

1. Stuart B, Panico L. Early-childhood BMI trajectories: evidence from a prospective, nationally representative British cohort study. *Nutr Diabetes*. 2016 Mar 7;6:e198.
2. World Health Organization. Obesity: preventing and managing the global epidemic: report of a WHO consultation. Geneva: WHO; 2000 p. 152. Report No.: 894.
3. Flouri E, Ioakeimidi S, Midouhas E, Ploubidis GB. Maternal psychological distress and child decision-making. *J Affect Disord*. 2017 Aug 15;218:35–40.
4. March of Dimes, PMNCH, Save the children, WHO. Born Too Soon: The Global action report on preterm Birth [Internet]. Geneva: CP Howson, MV Kinney, Jelawn. World Health Organization.; 2012 [cited 2019 Oct 25]. Available from: [https://www.who.int/maternal\\_child\\_adolescent/documents/born\\_too\\_soon/en/](https://www.who.int/maternal_child_adolescent/documents/born_too_soon/en/)
5. World Health Organization. ICD-10 : international statistical classification of diseases and related health problems : tenth revision. World Health Organization; 2004.
6. Villar J, Cheikh Ismail L, Victora CG, Ohuma EO, Bertino E, Altman DG, et al. International standards for newborn weight, length, and head circumference by gestational age and sex: the Newborn Cross-Sectional Study of the INTERGROWTH-21st Project. *Lancet*. 2014 Sep 6;384(9946):857–68.
7. Carling SJ, Demment MM, Kjolhede CL, Olson CM. Breastfeeding duration and weight gain trajectory in infancy. *Pediatrics*. 2015 Jan;135(1):111–9.
8. Fewtrell M, Bronsky J, Campoy C, Domellöf M, Embleton N, Fidler Mis N, et al. Complementary feeding: A position paper by the european society for paediatric gastroenterology, hepatology, and nutrition (ESPGHAN) committee on nutrition. *J Pediatr Gastroenterol Nutr*. 2017;64(1):119–32.
9. Hernández-Alava M, Popli G. Children's development and parental input: evidence from the UK millennium cohort study. *Demography*. 2017;54(2):485–511.
10. Anderson SE, Sacker A, Whitaker RC, Kelly Y. Self-regulation and household routines at age three and obesity at age eleven: longitudinal analysis of the UK Millennium Cohort Study. *Int J Obes*. 2017 Apr 24;41(10):1459–66.
11. Kroll ME, Carson C, Redshaw M, Quigley MA. Early father involvement and subsequent child behaviour at ages 3, 5 and 7 years: prospective analysis of the UK millennium cohort study. *PLoS One*. 2016 Sep 21;11(9):e0162339.
12. Rajyaguru P, Moran P, Cordero M, Pearson R. Disciplinary parenting practice and child mental health: evidence from the UK millennium cohort study. *J Am Acad Child Adolesc Psychiatry*. 2019;58(1):108–116.e2.
